# Supplementary material for: Adjustable nanofibers self-assembled from an irregular conformational peptide amphiphile
Source: Royal Society of Chemistry journal article supplement (doi:10.1039/c4py01237b), 2014-10-27
Supplement: c4py01237b1.pdf [file c4py01237b1.pdf]

**Electronic Supplementary Information**  
*of*  
**Adjustable nanofibers self-assembled from an irregular  
conformational peptide amphiphile**

Si-Yong Qin, Hua-Fang Jiang, Meng-Yun Peng, Qi Lei, Ren-Xi Zhuo and Xian-  
Zheng Zhang\*

Key Laboratory of Biomedical Polymers of Ministry of Education & Department of  
Chemistry, Wuhan University, Wuhan 430072, P. R. China

## Experimental Section

### 1. Materials

N-Fluorenyl-9-methoxycarbonyl L-amino acids (Fmoc-Asp(OtBu)-OH, Fmoc-Gly-OH, Fmoc-Leu-OH, Fmoc-Pro-OH), 2-chlorotrityl chloride resin (100-200 mesh, loading: 1.18 mmol/g), benzotriazole-N,N,N',N'-tetramethyluroniumhexafluorophosphate (HBTU), N-hydroxybenzotriazole (HOBT), and piperidine were purchased from GL Biochem (Shanghai) Ltd. (China) and used as received. Trifluoroacetic acid (TFA), N,N-Diisopropylethylamine (DIEA) and N,N-dimethylformamide (DMF) were obtained from Shanghai Reagent Chemical Co. and used after redistillation. Triisopropylsilane (TIS) was obtained from ACROS and used as received. Naproxen (Np) was purchased from Sigma-Aldrich. Matrix metalloproteinases-2 (MMP-2) was purchased from RD-SYSTEMS.

The other materials and chemicals were used as received without further purification.

### 2. Synthesis and characterization of the peptide amphiphile

Peptide Fmoc-GPLGLAGRGRGDFD was manually synthesized based on solid phase chemistry according to the literature procedure.<sup>S1,2</sup> After the completion of the peptide synthesis, Np was appended to the N-terminus of the peptide coupled by HBTU, HOBT and DIEA. The peptide amphiphile was cleaved from the resin with a cleavage cocktail comprised of 95% TFA, 2.5% TIS, and 2.5% H<sub>2</sub>O (v/v) for 2 h at room temperature, and then collected after precipitated with cold ether. The molecular

weight of the peptide amphiphile was analyzed by electrospray ionization mass spectrometry (ESI-MS, LCQ Advantage, Finigan, USA) in a component solvent of H<sub>2</sub>O and methanol. The theoretical molecular weight of the peptide was 1385.7, which found in ESI-MS was 1386.7, corresponding to the pattern of [M+H]<sup>+</sup> (Fig. S1). The purity of peptide amphiphile was 91%, which was determined by high performance liquid chromatography (HPLC, Prominence LC-20A, Shimadzu, Japan) with a C18 column. The eluent consisted of a linear gradient from 5 to 95% of H<sub>2</sub>O/acetonitrile containing 0.1% trifluoroacetic acid at 1 mL/min for 30 min (Fig. S2).

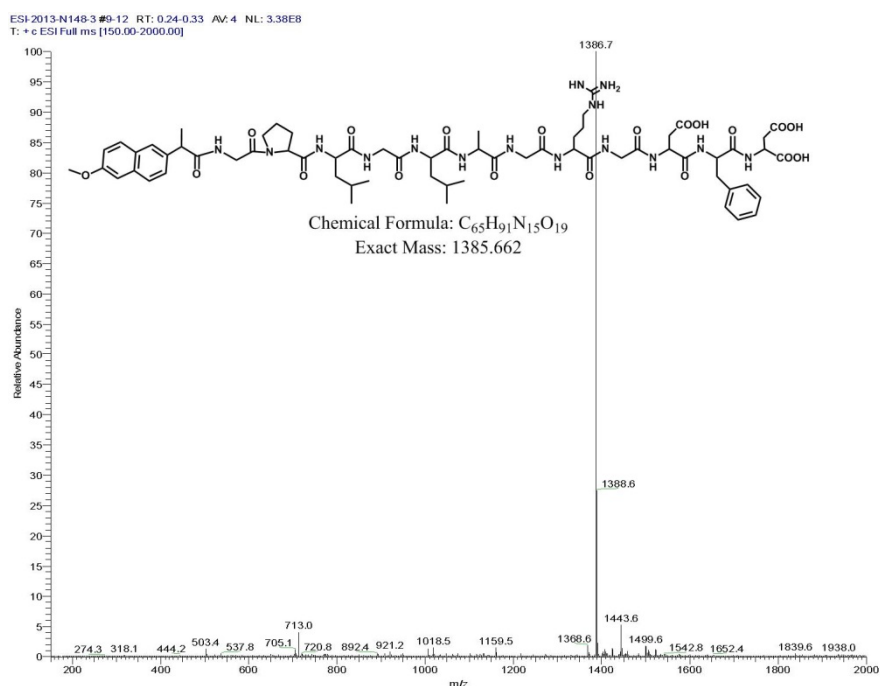

**Fig. S1** ESI-MS of the peptide amphiphile. [M+H]<sup>+</sup> at m/z 1386.7 was observed.

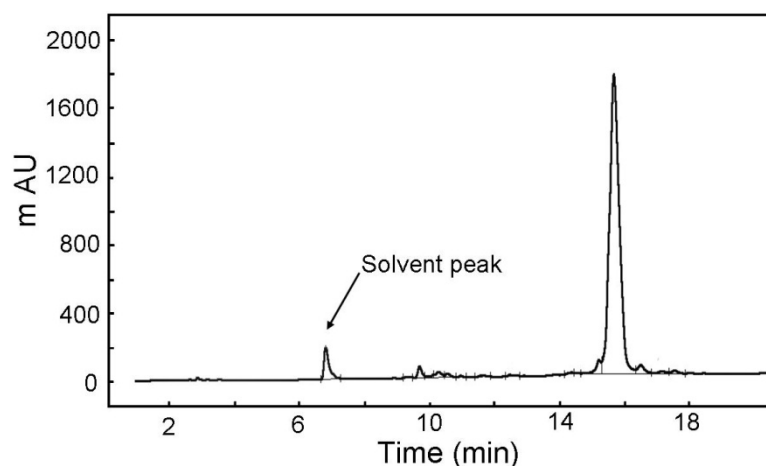

**Fig.S2** The HPLC profile of the peptide amphiphile.

### 3. Acid-Base Titration

The peptide amphiphile Np-Gly-Pro-Leu-Gly-Leu-Ala-Gly-Arg-Gly-Asp-Phe-Asp was suspended in distilled water at a concentration of 4.0 mg/mL. With respect to the acid-base titration of the acidic peptide, 1M NaOH was added to adjust the pH around 11, and 0.01 M HCl aqueous solution was added in 5-10  $\mu$ L equivalence. After each addition, the sample was constantly stirred for 3 min at room temperature, and the pH value of the solution was measured using a PB-10 Sartorius pH meter.

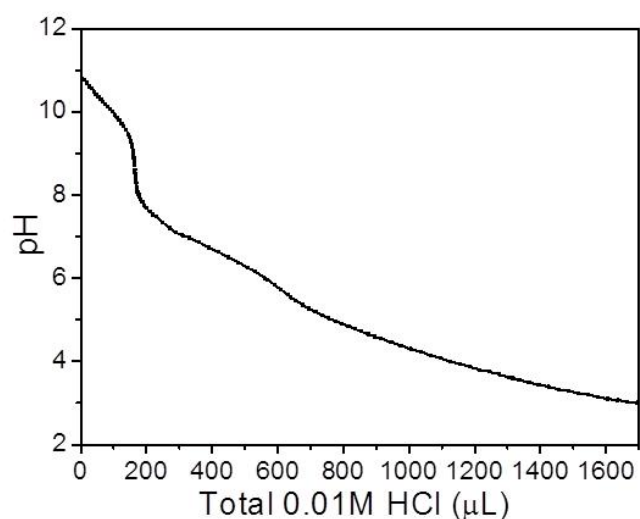

**Fig. S3** Acid-base titration curve of the peptide amphiphile at a concentration of 4 mg/mL.

#### 4. Formation of different self-assembled nanostructures

To obtain different self-assembled nanostructures, 1.0 mL of di-water was dropped into a 5 mL glass-vial which contained 4.0 mg of the lyophilized peptide powder. An aliquot of 1.0 M sodium hydroxide (NaOH) solution was added to the suspension to adjust the pH value to around 7.4. Ultrasonication was applied until the peptide was dissolved completely. Peptide self-assemblies formed under different pHs were prepared by gradiently adding 1.0 M hydrochloric acid (HCl). For preparing the peacock-feather-like nanofibers, saturated NaCl solution was added into the peptide solution containing dendritic nanofibers, resulting in 2.0 mM final NaCl concentration. Then the obtained solutions were stood for 12 h for the following experiments.

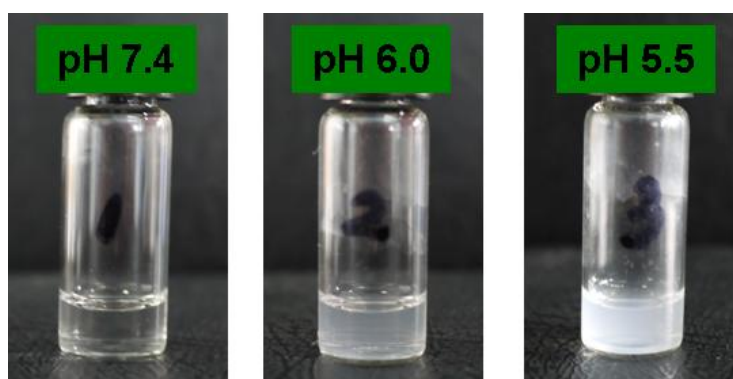

**Fig. S4** Turbidity transformation of the peptide amphiphile solutions at different pHs.

#### 5. $\zeta$ -Potential measurement

The  $\zeta$ -potentials of different self-assemblies were measured with Nano-ZS ZEN3600 (Malvern Instruments) at room temperature with a 0.5 mm cell. 4.0 mg/mL peptide solutions containing different self-assemblies were used for the  $\zeta$ -potential measurement.

#### 6. TEM and EDX characterizations

The self-assembled peptide morphologies formed at different pHs were observed by transmission electron microscopy (TEM, JEM-2010, Japan) and the elemental composition of the knots within the peacock-feather-like nanofibers was investigated with an accelerating voltage of 100 kV. The samples were prepared by dipping a copper grid into the solutions containing self-assemblies (4.0 mg/mL). After the deposition, the samples were dried in air for the observation.

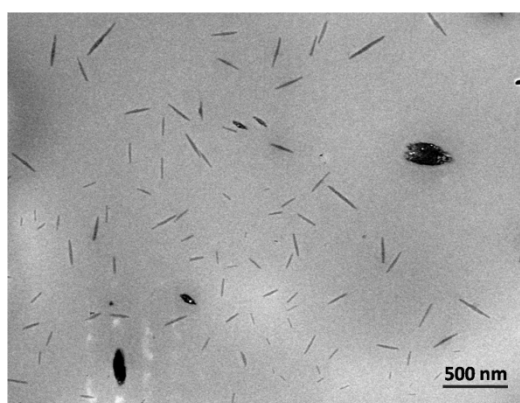

**Fig. S5** TEM image of the short nanofibers self-assembled by the U-shaped peptide at pH 7.4.

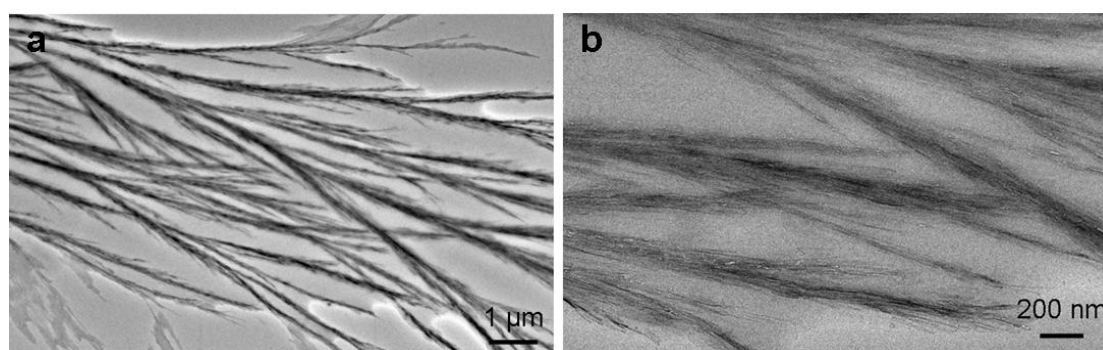

**Fig. S6** TEM images of self-assembled dendritic nanofibers with different magnification times.

## 7. Investigation of MMP2 to cleave U-shaped linker

To investigate the influence of topology of U-shaped peptide on the self-assembly

behavior, a commercialized matrix metalloproteinases-2 (MMP2) was exploited to cleave the U-shaped linker. A droplet of concentrated MMP2 (20  $\mu\text{L}$ ,  $2 \times 10^{-2}$  mg/mL) solution was added into the self-assembled solution containing dendritic nanofibers, and then co-cultured for one day at 37°C to ensure the effective cleavage. The solution containing self-assembled dendritic nanofibers with the performance of adding same volume of buffer solution without MMP2 was located at 37°C for one day as control. TEM images in Fig. S7 indicated the different self-assembled morphologies co-incubated without and with MMP2, respectively.

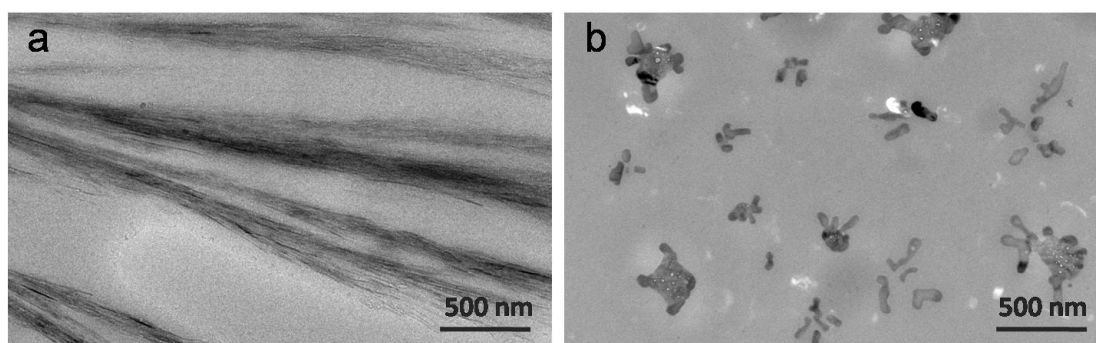

**Fig. S7** TEM images of self-assembled dendritic nanofibers co-incubated without (a) and with MMP2 (b) for one day at 37°C, respectively.

## 8. SEM characterization

Scanning electron microscopy (SEM) was also carried out to synergistically investigate the self-assembled morphologies of the peptide. 4.0 mg/mL peptide solutions containing self-assemblies were dropped onto glass substrates, respectively. After dried in air, the specimens were coated with gold before examination. The examination was performed on a NovaNano SEM FEI (Holland) instrument with an accelerating voltage of 30 kV.

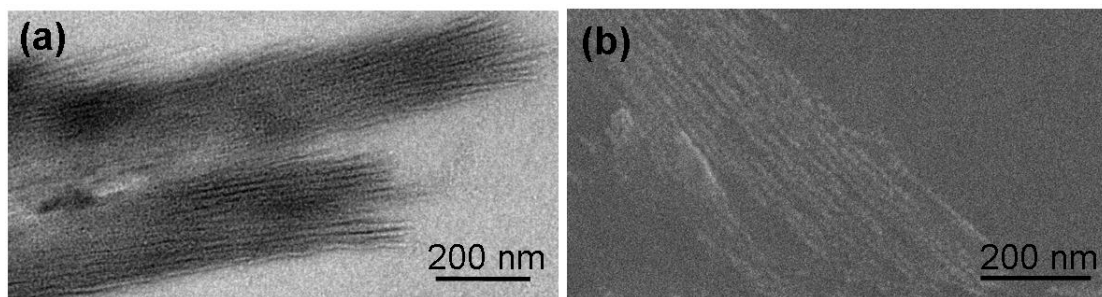

**Fig. S8** TEM (a) and SEM images (b) of the self-assembled parallel nanofiber formed at pH 5.5 with a concentration of 4.0 mg/mL.

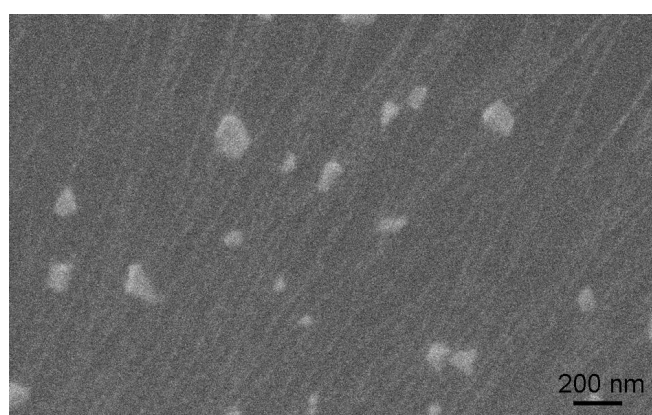

**Fig. S9** SEM image of the self-assembled parallel nanofibers after the culture with 2.0 mM NaCl.

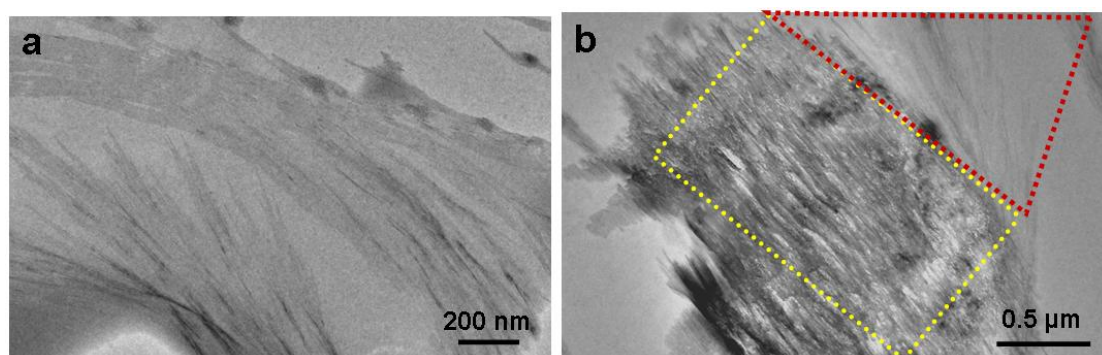

**Fig. S10** TEM images of self-assembled transition state with the coexistence of dendritic and parallel nanofibers formed at pH 5.8. The dendritic nanofibers began to rearrange when triggered by the addition of 1.0 M HCl (a); and the nanofibers marked



by yellow rectangle representing the parallel matrix and nanofibers marked by red triangle representing the dendritic matrix (b).

## 9. CD measurement

Circular dichroism (CD) was recorded on a J-810 spectropolarimeter (Jasco, Japan) for the purpose of investigating the secondary structure of peptide self-assemblies. 4.0 mg/mL peptide solution was fixed into a 0.5 mm quartz cell and analyzed with 4 s accumulations every 1 nm. The data range was collected from 180 nm to 320 nm.

## 10. FT-IR spectroscopy

Fourier transform-infrared (FT-IR) spectra of the lyophilized self-assembled nanofiber matrixes were performed on an AVATAR 360 spectrometer (Perkin-Elmer, USA). Prior to the measurement, the self-assembled peptide powder was pressed into potassium bromide (KBr) pellet with KBr powder. To investigate the conformation of the self-assembled peptide in aqueous environment, the aqueous FT-IR spectra of the peptide in different pHs (7.4, 6.0 and 5.5) were also obtained using D<sub>2</sub>O as the solvent, and 1 M NaOH solution was used to adjust the pH value.

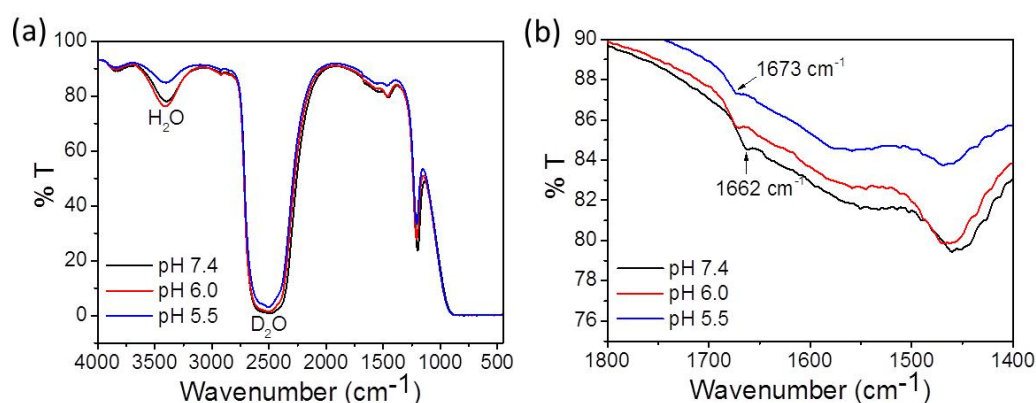

**Fig. S11** FT-IR spectra of the peptide in different pH solutions. The peak at 1673 cm<sup>-1</sup> was observed for the peptide solutions at pH 6.0 and 5.5.

## 11. Fluorescent spectroscopy

Fluorescent spectra of the self-assemblies at different pHs were recorded on a LS55 luminescence spectrometry (Perkin-Elmer), with excitation wavelength at 265 nm. Emission data range from 280 nm to 650 nm was collected to detect the  $\pi$ - $\pi$  stacking interaction of Np groups.

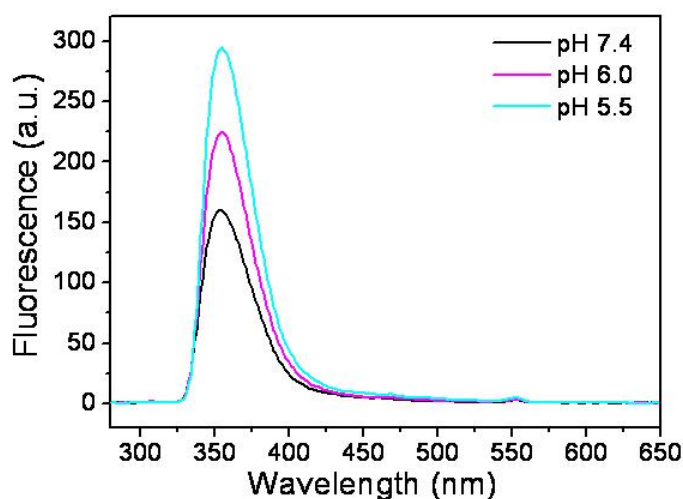

**Fig. S12** Fluorescence emission ( $\lambda_{ex}=265\text{nm}$ ) spectra of the peptide solutions at different pHs.

## 12. UV-Vis spectroscopy

Ultraviolet-visible (UV-Vis) absorption spectra of the self-assemblies at different pHs were recorded with a spectrophotometer (Perkin-Elmer Lambda Bio 40 UV-Vis spectrometer, USA) from 200 nm to 400 nm.

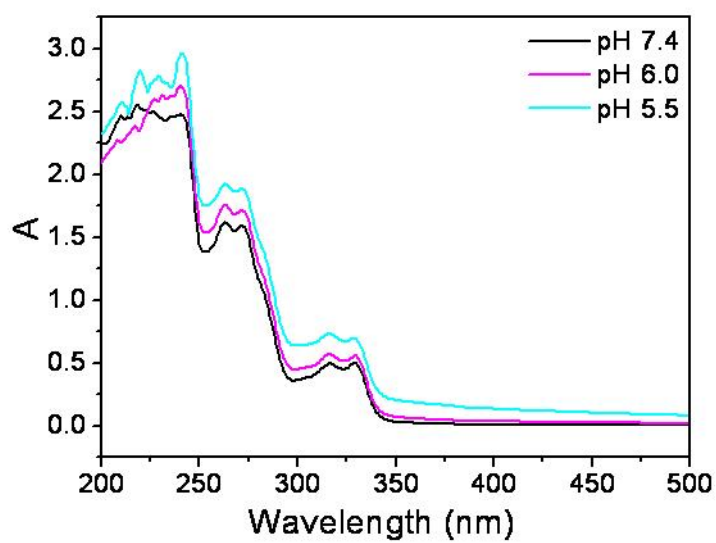

**Fig. S13** Ultraviolet-visible absorption spectra of the peptide solutions at different pHs.

## References

- S1 S. Y. Qin, Y. F. Chu, L. Tao, S. S. Xu, Z. Y. Li, R. X. Zhuo and X. Z. Zhang, *Soft Matter*, 2011, **7**, 8635.
- S2 S. Y. Qin, S. S. Xu, R. X. Zhuo and X. Z. Zhang, *Langmuir*, 2012, **28**, 2083.
